# Supplementary material
Source: PubMed Central journal article supplement (PMC8495603)
Supplement: jamasurg-e214568-s001.pdf [file jamasurg-e214568-s001.pdf]

1 **A randomized, parallel-group, 30-day, difference analysis study to investigate**  
2 **the efficacy of the transanal drainage tube (TDT) for anastomotic leakage (AL)**  
3 **prevention following the laparoscopic low anterior resection for rectal cancer**

# Clinical Study Protocol

11 **Principle Investigator:** Prof. Weidong Tong

12 Address: N0.10, Changjiangzhu, Daping, Yuzhong District,  
13 Chongqing, 400042, China.

14 Telephone: +8613500321218

15 Email: [vdton@163.com](mailto:vdton@163.com)

16 **Primary Sponsor:** Army Medical Center (Daping Hospital), Army Medical  
17 University

18 Version: 1.0

19 Date: 2016- Feb-20

## Confidentiality statement

24 The relevant information contained in this document involves research confidentiality. The ownership of this research  
25 information belongs to a specific research unit. Unless required by regulations, no one may disclose such confidential content  
26 without authorization. Anyone who accepts the document will be informed of the ownership and confidentiality of the document,  
27 and shall not disclose the document without authorization. The restrictions on the disclosure of the above documents will be  
28 effective for all relevant information provided to you in the future, as long as the information is marked as ownership and  
29 confidential.

30 **Table of Contents**

31 Protocol Synopsis.....3

32 1 Background.....6

33 2 Study Title.....7

34 3 Objective.....7

35 3.1 Research Hypothesis.....7

36 3.2 Study Objective.....8

37 4 Intervention(s).....8

38 5 Trial Design.....8

39 5.1 Groups:.....8

40 6 Eligibility Criteria.....8

41 6.1 Inclusion criteria.....8

42 6.2 Exclusion criteria.....9

43 7 Sample Size Estimation.....9

44 8 Standard operating procedures (SOP).....9

45 9 Follow-up plan.....11

46 10 Outcomes Measures.....11

47 10.1 Primary Outcome Measures.....11

48 10.2 Secondary Outcome Measures.....12

49 11 Data Collection Methods.....12

50 11.1 Case report form (CRF).....12

51 11.2 Original data record.....13

52 11.3 Quality control.....13

53 12 Statistical Analysis Plan.....13

54 13 Research Ethics Approval.....14

55 13.1 Ethical Committees Approval.....14

56 13.2 Informed Consent.....14

57 13.3 Participant confidentiality.....15

58 13.4 Protocol Amendments.....15

59 14 Committee.....16

60 14.1 Lead Investigators.....16

61 14.2 Data Manager.....16

62 14.3 Quality control committee (QCC).....17

63 15 Adverse Events.....17

64 15.1 Classification of adverse events.....17

65 15.2 Records of Adverse Events.....18

66 15.3 Report of Adverse Events.....18

67 Appendix 1.....19

68 Appendix 2.....21

69 Reference.....22

70

71

72 **Protocol Synopsis**

|                                                      |                                                                                                                                                                                                                                                           |
|------------------------------------------------------|-----------------------------------------------------------------------------------------------------------------------------------------------------------------------------------------------------------------------------------------------------------|
| <b>Study Title</b>                                   | Use of the TDT for Prevention of Anastomotic Leakage After Laparoscopic Anterior Resection for Rectal Cancer                                                                                                                                              |
| <b>Scientific Title</b>                              | A randomized, parallel-group, 30-day, difference analysis study to compare the efficacy of the transanal drainage tube (TDT) for anastomotic leakage (AL) prevention following the laparoscopic low anterior resection for rectal cancer                  |
| <b>Contact Investigator</b>                          | Prof. Weidong Tong                                                                                                                                                                                                                                        |
| <b>Primary sponsor</b>                               | Army Medical Center (Daping Hospital), Army Medical University                                                                                                                                                                                            |
| <b>Primary Registry and Trial Identifying Number</b> | ClinicalTrials.gov<br>NCT02686567                                                                                                                                                                                                                         |
| <b>Date of Registration In Primary Registry</b>      | 02/19/2016                                                                                                                                                                                                                                                |
| <b>Funding Support</b>                               | None                                                                                                                                                                                                                                                      |
| <b>Study Objective</b>                               | To evaluate whether the TDTs can reduce the incidence of anastomotic leakage after laparoscopic anterior resection for rectal cancer                                                                                                                      |
| <b>Intervention(s)</b>                               | For patients who were assigned to the TDT group, a silicone tube (28Fr, Sumitomo Bakelite Co, Japan) is inserted through the anus and the tip of the tube is placed approximately 5 cm above the anastomosis under laparoscopy at the end of the surgery. |
| <b>Groups</b>                                        | <ul style="list-style-type: none"> <li>● TDT group: application of TDT after laparoscopic low anterior resection for rectal cancer</li> </ul>                                                                                                             |

|                                                    |                                                                                                                                                                                                                                                                                                                                                                                                                                                                                                                                                                                                                                                                                                                                                                                                                                                                                                                                                                                                                                                                                                                                 |
|----------------------------------------------------|---------------------------------------------------------------------------------------------------------------------------------------------------------------------------------------------------------------------------------------------------------------------------------------------------------------------------------------------------------------------------------------------------------------------------------------------------------------------------------------------------------------------------------------------------------------------------------------------------------------------------------------------------------------------------------------------------------------------------------------------------------------------------------------------------------------------------------------------------------------------------------------------------------------------------------------------------------------------------------------------------------------------------------------------------------------------------------------------------------------------------------|
|                                                    | <ul style="list-style-type: none"> <li>● Non-TDT group (control): without TDT application</li> </ul>                                                                                                                                                                                                                                                                                                                                                                                                                                                                                                                                                                                                                                                                                                                                                                                                                                                                                                                                                                                                                            |
| <p><b>Key Inclusion And Exclusion Criteria</b></p> | <p>Ages Eligible for Study: <math>\geq 18</math> years</p> <p>Sexes Eligible for Study: both</p> <p>Accepts healthy volunteers: no</p> <p><b>Inclusion criteria:</b></p> <ul style="list-style-type: none"> <li>● age from 18 to 80 years old</li> <li>● primary rectal adenocarcinoma</li> <li>● tumor location <math>\leq 10</math> cm</li> <li>● ASA I, II, or III</li> <li>● laparoscopic LAR + DST</li> <li>● patients and their families can understand and are willing to participate in this study and provide written informed consent</li> </ul> <p><b>Exclusion criteria:</b></p> <ul style="list-style-type: none"> <li>● emergency operation</li> <li>● patients with preoperative radiotherapy</li> <li>● patients with IBD, FAP, recurrent rectal cancer, or synchronous cancer, other types of surgeries for rectal cancer</li> <li>● patients with serious mental illness or uncontrolled infections before surgery</li> <li>● pregnant or breastfeeding women</li> <li>● patients with other clinical and laboratory conditions considered by the investigator should not participate in the trial</li> </ul> |
| <p><b>Study Type</b></p>                           | <ul style="list-style-type: none"> <li>● Interventional</li> <li>● Allocation: randomized</li> <li>● Intervention model: the parallel assignment</li> <li>● Masking: no</li> <li>● Primary purpose: comparison</li> </ul>                                                                                                                                                                                                                                                                                                                                                                                                                                                                                                                                                                                                                                                                                                                                                                                                                                                                                                       |
| <p><b>Target Sample</b></p>                        | <p>560</p>                                                                                                                                                                                                                                                                                                                                                                                                                                                                                                                                                                                                                                                                                                                                                                                                                                                                                                                                                                                                                                                                                                                      |

|                               |                                                                                                                                                                                                                                                                                                                                                                                                                                                                                                                                                                                                                                                                                                                                                                                                                                                                                                                     |
|-------------------------------|---------------------------------------------------------------------------------------------------------------------------------------------------------------------------------------------------------------------------------------------------------------------------------------------------------------------------------------------------------------------------------------------------------------------------------------------------------------------------------------------------------------------------------------------------------------------------------------------------------------------------------------------------------------------------------------------------------------------------------------------------------------------------------------------------------------------------------------------------------------------------------------------------------------------|
| <b>Size</b>                   |                                                                                                                                                                                                                                                                                                                                                                                                                                                                                                                                                                                                                                                                                                                                                                                                                                                                                                                     |
| <b>Recruitment Status</b>     | Recruiting                                                                                                                                                                                                                                                                                                                                                                                                                                                                                                                                                                                                                                                                                                                                                                                                                                                                                                          |
| <b>Primary Outcome(s)</b>     | AL rate within 30 days after surgery in 2 groups                                                                                                                                                                                                                                                                                                                                                                                                                                                                                                                                                                                                                                                                                                                                                                                                                                                                    |
| <b>Key Secondary Outcomes</b> | <ul style="list-style-type: none"> <li>● Grades of AL</li> <li>● Postoperative anal pain score</li> <li>● TDT-related adverse events: bleeding</li> <li>● TDT-related adverse events: iatrogenic colonic perforations(ICP)</li> </ul>                                                                                                                                                                                                                                                                                                                                                                                                                                                                                                                                                                                                                                                                               |
| <b>Sample Size Estimation</b> | Based on the synthesis of information from multiple published studies with large sample sizes, we assume that the AL rate will be reduced from 10.5% to the expected 4% due to the TDT intervention. With an 80% power and a 5% significance level, and an expected crossover rate of 1%, and a dropout rate of 10%, we needed to recruit 560 patients overall                                                                                                                                                                                                                                                                                                                                                                                                                                                                                                                                                      |
| <b>Study Method</b>           | <ol style="list-style-type: none"> <li>1. Eligible patients are randomly assigned to two groups with a 1:1 allocation ratio (TDT and non-TDT group) after the laparoscopic LAR and DST procedures are chosen during the operation</li> <li>2. Simple randomization was obtained through computer-generated random number sequence allocation by the <i>Quality Control Committee</i>.</li> <li>3. Allocation concealment was performed: After completion of the anastomosis and further DS construction if necessary, the surgeon was notified to implement the intervention based on the randomization results by the circulating nurse</li> <li>4. Quality requirements: All perioperative treatments must comply with relevant guidelines. The preservation of the left colonic artery was assessed by the surgeon according to his or her own experiences and assessment of the patient's conditions</li> </ol> |

|  |                                                                                                                                                                                                                                                                                                                                                                                                                                                                                                                                                                                                                                                                                                                                                                                                                                                                                                                                                                                                                                                                                                                                                                                                                                                                                 |
|--|---------------------------------------------------------------------------------------------------------------------------------------------------------------------------------------------------------------------------------------------------------------------------------------------------------------------------------------------------------------------------------------------------------------------------------------------------------------------------------------------------------------------------------------------------------------------------------------------------------------------------------------------------------------------------------------------------------------------------------------------------------------------------------------------------------------------------------------------------------------------------------------------------------------------------------------------------------------------------------------------------------------------------------------------------------------------------------------------------------------------------------------------------------------------------------------------------------------------------------------------------------------------------------|
|  | <ol style="list-style-type: none"><li>5. The decision regarding DS construction was made by the surgeon</li><li>6. A silicone tube (28Fr, Sumitomo Bakelite Co, Japan) is inserted through the anus and the tip of the tube is placed approximately 5 cm above the anastomosis under laparoscopy at the end of the surgery in patients of TDT group</li><li>7. The tube is fixed with a skin suture and connected to a drainage bag</li><li>8. TDT is planned to remove 3-7 days after surgery according to the surgeon's discretion when the discharge of feces or flatus was clearly and repeatedly observed and/or when surgeons confirmed the absence of signs of AL</li><li>9. Early removal is allowed if the patient experienced intolerable pain</li><li>10. AL will be recorded within 30 days after surgery (the definition of AL is detailed in the following text ,see 8.1 )</li><li>11. Grades of AL will be identified and recorded</li><li>12. The numerical rating scale (NRS) is used to assess the anal postoperative pain score of patients in the TDT group. The assessment will be performed every day postoperatively until the TDT is removed</li><li>13. TDT-related adverse events such as bleeding and ICPs will be identified and recorded</li></ol> |
|--|---------------------------------------------------------------------------------------------------------------------------------------------------------------------------------------------------------------------------------------------------------------------------------------------------------------------------------------------------------------------------------------------------------------------------------------------------------------------------------------------------------------------------------------------------------------------------------------------------------------------------------------------------------------------------------------------------------------------------------------------------------------------------------------------------------------------------------------------------------------------------------------------------------------------------------------------------------------------------------------------------------------------------------------------------------------------------------------------------------------------------------------------------------------------------------------------------------------------------------------------------------------------------------|

73

## 74 1 Background

75 Anastomotic leakage (AL) is one of the most dreadful complications after LAR  
76 and is associated with increased medical costs, longer hospital stay, higher  
77 postoperative morbidity, and mortality for patients, even higher rate of recurrence(1).  
78 Diverting stoma (DS) is still one of the most common methods used in AL prevention,  
79 despite the clinical benefit of reducing morbidity from anastomotic leaks, DS remains  
80 a large source of morbidity for patients, with increased postoperative stay,

81 readmission, dehydration, etc(2-4). It has been reported that the transanal drainage  
82 tube (TDT) is valuable and safe to prevent AL after LAR, but doubts about this never  
83 ceased. The potential role of applying a TDT is supposed to be beneficial for  
84 endoluminal pressure reduction as well as fecal diversion, resulting in a protective  
85 effect on anastomotic healing (5). Several meta-analytical studies have reported that  
86 the TDT is effective in AL prevention (6). However, the majority of previous studies  
87 have the limitation of retrospective observation, a small sample size or utilization of a  
88 nonrandomized control group. Moreover, inconsistent results have also been reported,  
89 failing to prove the effectiveness of the implementation (7-9). Cong and his  
90 colleagues reported that the AL rate in the TDT group was unexpectedly higher than  
91 that in the non-TDT group (15.1% vs. 4.9%,  $P = 0.008$ )(9). Zhao supposed that the  
92 TDT would reduce anastomotic complications but found that the AL rate was not  
93 significantly different between the two groups (2.5% vs. 7.8%,  $P = 0.160$ )(8). In a  
94 study using propensity score matching (PSM), Yang reported no significant difference  
95 in the overall AL rate between the two groups (9.8% vs. 11.8%,  $P = 0.652$ ). A similar  
96 result was concluded by Lee in their retrospective study, both before and after PSM  
97 (5.8% vs. 10.7%,  $P = 0.652$ ; 5.8% vs. 9.1%,  $P = 0.278$ , respectively)(7). Therefore,  
98 due to the lack of a high level of evidence, the role of TDTs in AL prevention after  
99 LAR is still unclear.

## 100 **2 Study Title**

101 Use of the TDT for Prevention of Anastomotic Leakage After Laparoscopic  
102 Anterior Resection for Rectal Cancer.

## 103 **3 Objective**

### 104 **3.1 Research Hypothesis**

105 The null hypothesis is that the AL rate of patients with TDT is the same as that  
106 without TDT within 30 days following laparoscopic LAR. ( $H_0$ )

107 The alternative hypothesis is that the AL rate of patients with TDT is different  
108 from that without TDT within 30 days following laparoscopic LAR. ( $H_1$ )

109        **3.2 Study Objective**

110        To evaluate whether the TDTs can reduce the incidence of anastomotic leakage  
111 after laparoscopic anterior resection for rectal cancer.

112        **4 Intervention(s)**

113        A silicone tube (28Fr, Sumitomo Bakelite Co, Japan) is inserted through the anus and the tip  
114 of the tube is placed approximately 5 cm above the anastomosis under laparoscopy at the end of  
115 the surgery in patients from the TDT group.

116        **5 Trial Design**

117        This trial is designed as a randomized, controlled, open-label, multicenter,  
118 difference analysis study with two parallel groups and a primary endpoint of  
119 anastomotic leakage within 30 days after laparoscopic low anterior resection for rectal  
120 cancer.

121        **5.1 Groups:**

122        Randomization will be performed with a 1:1 allocation ratio.

- 123        ● TDT group: application of TDTs after laparoscopic low anterior resection  
124        for rectal cancer.
- 125        ● Non-TDT group (control): without TDT application.

126        **6 Eligibility Criteria**

127        Patients (or a representative) must provide written, informed consent before any  
128 study procedures occur.

129        **6.1 Inclusion criteria**

130        All patients should meet the surgical conditions under the Chinese guideline for the  
131 diagnosis and treatment of colorectal cancer. Besides, patients eligible for the trial  
132 must comply with all of the following at randomization:

- 133        ● Age from 18 to 80 years old



134 ● Primary rectal adenocarcinoma

135 ● Tumor location  $\leq$  10 cm

136 ● ASA I, II, or III

137 ● Laparoscopic LAR + DST

## 138 **6.2 Exclusion criteria**

139 ● Emergency operation

140 ● Patients with preoperative radiotherapy

141 ● Patients with IBD, FAP, recurrent rectal cancer, or synchronous cancer, other  
142 types of surgeries for rectal cancer

143 ● Patients with serious mental illness or uncontrolled infections before surgery

144 ● Pregnant or breastfeeding women

145 ● Patients with other clinical and laboratory conditions considered by the  
146 investigator should not participate in the trial

## 147 **7 Sample Size Estimation**

148 Based on the synthesis of information from multiple published studies with large  
149 sample sizes (5, 10-15), we assume that the AL rate will be reduced from 10.5% to the  
150 expected 4% due to the TDT intervention. With an 80% power and a 5% significance  
151 level, and an expected crossover rate of 1%, and a dropout rate of 10%, we needed to  
152 recruit 560 patients overall

## 153 **8 Standard operating procedures (SOP)**

154 8.1 All patients should meet the surgical conditions under the Chinese guideline  
155 for the diagnosis and treatment of colorectal cancer

156 8.2 Perioperative management should comply with relevant guidelines. For  
157 example, routinely implement mechanical bowel preparation combined  
158 with antibiotics before surgery, nutritional risk assessment and support;  
159 postoperative antibiotics and nutritional support treatment must strictly

- 160           comply with the requirements of the local health department; pay attention  
161           to pain management.
- 162       8.3   After reporting relevant information to the *Quality Control Committee*,  
163           eligible patients are randomly assigned to two groups with a 1:1 allocation  
164           ratio (TDT and non-TDT group) after the laparoscopic LAR and DST  
165           procedures are chosen during the operation.
- 166       8.4   Simple randomization was obtained through computer-generated random  
167           number sequence allocation by the *Quality Control Committee*.
- 168       8.5   Allocation concealment was performed: After completion of the  
169           anastomosis and further DS construction if necessary, the surgeon was  
170           notified to implement the intervention based on the randomization results  
171           by the circulating nurse.
- 172       8.6   Quality requirements: All procedures must be performed by experienced  
173           surgeons who had performed at least 300 laparoscopic LARs before the  
174           study. All perioperative treatments must comply with relevant guidelines.  
175           The preservation of the left colonic artery was assessed by the surgeon  
176           according to his or her own experiences and assessment of the patient's  
177           conditions.
- 178       8.7   The decision regarding DS construction was made by the surgeon.
- 179       8.8   A silicone tube (28Fr, Sumitomo Bakelite Co, Japan) is inserted through the  
180           anus and the tip of the tube is placed approximately 5 cm above the  
181           anastomosis under laparoscopy at the end of the surgery in patients from  
182           the TDT group.
- 183       8.9   The tube is fixed with a skin suture and connected to a drainage bag.
- 184       8.10  TDT is planned to remove 3-7 days after surgery according to the surgeon's  
185           discretion when the discharge of feces or flatus was clearly and repeatedly  
186           observed and/or when surgeons confirmed the absence of signs of AL.
- 187       8.11  Early removal is allowed if the patient experienced intolerable pain.
- 188       8.12  Record whether the patient has AL-related symptoms and signs, collect  
189           blood routine, albumin, prealbumin and other laboratory test results on the  
190           day after the operation, postoperative day (POD) 1, 3, 5, and so on. Record  
191           the pelvic drainage volume and fluid properties every day after the  
192           operation, and combine the above inspection results as an important

193 supporting result for evaluating the presence or absence of AL and the  
194 grades.

195 8.13 AL will be recorded within 30 days after surgery (the definition of AL is  
196 detailed in the following text )

197 8.14 Grades of AL will be identified and recorded

198 8.15 The numerical rating scale (NRS) is used to assess the anal postoperative  
199 pain score of patients in the TDT group.

200 8.16 TDT-related adverse events such as bleeding and ICPs will be identified  
201 and recorded.

202 8.17 Discharge criteria: able to take a liquid or semi-liquid diet; there are signs  
203 of recovery of intestinal function; normal body temperature; no positive  
204 signs in abdominal examination; able to go to the ground and have a certain  
205 ability to take care of themselves.

## 206 **9 Follow-up plan**

207 9.1 Follow-up period: within 30 days after surgery;

208 9.2 Designate a investigator to keep in touch with discharged patients, and  
209 instruct patients to return to the hospital for follow-up treatment if they feel  
210 unwell;

211 9.3 The follow-up content focuses on the presence or absence of AL-related  
212 symptoms or signs such as abdominal pain, chills, fever, and acute  
213 abdomen after discharge, as well as other symptoms that observers believe  
214 are related to AL (this can be determined by discussion with lead  
215 observers).

## 216 **10 Outcomes Measures**

### 217 **10.1 Primary Outcome Measures**

218 The primary endpoint is the AL rate within 30 days after surgery.

219 AL was defined when the following symptoms were noticed: abdominal pain;  
220 fever; peritonitis; leukocytosis; increased procalcitonin (PCT) or C-reactive protein  
221 (CRP); discharge of feces, pus, or gas from the drainage tube or the vagina; and

222 septicemia with pelvic abscess. All clinically suspicious symptoms were confirmed by  
223 digital rectal examination, computed tomography (CT) scan, or surgery when  
224 necessary (5, 7-9, 16-20).

## 225 **10.2 Secondary Outcome Measures**

- 226 ● The grades of AL. The severity grading of AL was defined according to the  
227 International Study Group of Rectal Cancer(21). In the present study, AL was  
228 referred to as grades B and C, and asymptomatic AL (grade A) was not  
229 considered because no active therapeutic intervention was required.
- 230 ● Anal postoperative pain score. The numerical rating scale (NRS) is used to assess  
231 the anal postoperative pain score of patients in the TDT group. The assessment  
232 will be performed every day postoperatively until the TDT is removed.
- 233 ● TDT-related adverse events such as bleeding and ICPs. Only 2 cases of iatrogenic  
234 colonic perforations (ICPs) were reported in all cases of previous studies. The  
235 underline benefit will be a significant reduction of AL rate in patients with TDTs  
236 while the underline harms may be bleeding, ICP, or discomfort caused by TDTs.

## 237 **11 Data Collection Methods**

238 The data to be collected includes but is not limited to the following: preoperative  
239 information including gender, age, contact information; basic hospitalization  
240 information of the patient; related examination results including colonoscopy, CT,  
241 MRI, etc.; surgery related including operation methods, operation time, blood loss, etc.  
242 The postoperative related information includes laboratory results such as blood  
243 routine, albumin, patient symptoms, signs, pelvic drainage and traits, and related  
244 measurement results of TDT. See the Case Report Forms (CRFs) for details.

### 245 **11.1 Case report form (CRF)**

246 In this trial, the required observation or inspection items need to be recorded in  
247 the case report form. The contents of the case report form must be completely  
248 consistent with the original data. For the results calculated from the original data, the  
249 calculation basis should be traceable.

250 **11.2 Original data record**

251 All information should be recorded in the CRFs in a timely, truthful and detailed  
252 manner. The *Data Manager* will check the completeness and accuracy of the CRF  
253 and make necessary modifications or additions.

254 **11.3 Quality control**

255 Perform corresponding inspections and evaluations as required and record them in  
256 the CRFs. All forms must be completed, signed, and dated by the investigators. The  
257 *lead investigators* check every 6 months, supervise the completion of the CRF forms,  
258 and conduct a review and signature. All items should have a corresponding objective  
259 basis, be prepared for review and use, and should not be fabricated. The *Data*  
260 *Manager* should carefully check each CRF and sign it after confirming that it is  
261 complete and correct. The medical records required to be recorded are true and  
262 reliable, properly kept, and subject to random inspections at any time. If you make  
263 any mistakes and modify them, you should sign and date them, and the original  
264 modification can be identified.

265 **12 Statistical Analysis Plan**

- 266 ● Public health statisticians and *lead investigators* formulate statistical  
267 analysis plans based on the research plan; *Data Manager* will perform  
268 statistical analysis according to the statistical plan.
- 269 ● Sample size estimation was performed using PASS, version 11 (NCSS,  
270 LLC, Kaysville, UT, USA).
- 271 ● Statistical analysis will be performed using SPSS, version 25.0 (Statistical  
272 Package for the Social Sciences, IBM Corporation, Armonk, NY, USA).
- 273 ● All analyses are two-sided, and a  $P < 0.05$  is considered statistically  
274 significant.
- 275 ● Analyses of the primary and secondary endpoints are based on the  
276 intention-to-treat (ITT) principles. Per-protocol (PP) analysis is restricted to  
277 the participants who fulfilled the protocol in the terms of eligibility,  
278 interventions, and outcome assessment.

- 279 ● A chi-square test or Fisher's exact test is used for the comparison of  
280 categorical variables, as appropriate. This mainly involves the baseline data,  
281 the primary outcomes (AL rate) and the grades of AL of the two groups of  
282 patients.
- 283 ● Continuous variables are expressed as the median and interquartile range  
284 (IQR) and are analyzed using a Mann -Whitney U test if not normally  
285 distributed, or are expressed as mean  $\pm$  standard deviation (SD) and  
286 analyzed using Student's t-test if normally distributed. This mainly involves  
287 the baseline data of the two groups of patients.
- 288 ● The comparison of the AL rate in two arms is performed using a chi-square  
289 test and is present as relative risk (RR) with a 95% confidence interval (CI).
- 290 ● Subgroup analysis is not considered at this stage, post hoc subgroup  
291 analysis will be planning to perform when suitable.
- 292 ● Univariate and multivariate logistic regression analysis can be performed to  
293 identify the factors which would facilitate the surgeon's decision of DS  
294 construction or the factors of high risk of AL.
- 295 ● Missing values handling: This study does not fill in missing values.

## 296 **13 Research Ethics Approval**

### 297 **13.1 Ethical Committees Approval**

298 This protocol and the template informed consent forms will be reviewed and  
299 approved by the sponsor and the applicable *ethical committees* concerning scientific  
300 content and compliance with applicable research and human subjects regulations.

301 The protocol, site-specific consent forms, participant education, and recruitment  
302 materials, and other requested documents - and any subsequent modifications - also  
303 will be reviewed and approved by the ethical review bodies.

### 304 **13.2 Informed Consent**

305 Trained residents will introduce the trial to patients. Patients will also receive  
306 information sheets. Research residents will discuss the trial with patients in light of

307 the information provided in the information sheets. Patients will then be able to have  
308 an informed discussion with the participating consultant. Research residents will  
309 obtain written consent from patients willing to participate in the trial.

### 310 **13.3 Participant confidentiality**

311 All study-related information will be stored securely at the study site. All  
312 participant information will be stored in locked file cabinets in areas with limited  
313 access. All laboratory specimens, reports, data collection, process, and administrative  
314 forms will be identified by a coded ID [identification] number only to maintain  
315 participant confidentiality. All records that contain names or other personal identifiers,  
316 such as locator forms and informed consent forms, will be stored separately from  
317 study records identified by code number. All local databases will be secured with  
318 password-protected access systems. Forms, lists, logbooks, appointment books, and  
319 any other listings that link participant ID numbers to other identifying information  
320 will be stored in a separate, locked file in an area with limited access. Participants'  
321 study information will not be released outside of the study without the written  
322 permission of the participant.

### 323 **13.4 Protocol Amendments**

324 After this protocol has been approved by the *ethical committees*, if there are  
325 major changes during the implementation process, the contact investigator will draft  
326 an instruction about the amendments and sign it, and report to the *ethical committees*  
327 for approval before implementation. The *Quality Control Committee* will discuss  
328 with methodologists and sign together. Administrative changes to the protocol are  
329 minor corrections and/or clarifications that do not affect the way the study is to be  
330 conducted. These administrative changes will be agreed upon by the *Quality Control*  
331 *Committee* and will be documented in a memorandum.

332 Revision Chronology:

---

| Date | Version | Overview of the |
|------|---------|-----------------|
|------|---------|-----------------|

---

|                    |             | <b>Amendment</b> |
|--------------------|-------------|------------------|
| <b>2016-Feb-20</b> | version 1.0 | Original         |

333 **14 Committee**

334 Before the start of the trial, organize project team members to study this clinical  
335 research plan to fully understand and master the requirements and content of this  
336 research.

337 **14.1 Lead Investigators**

338 In each participating center, a lead investigator will be identified, to be  
339 responsible for the identification, recruitment, data collection, and completion of  
340 CRFs, along with follow-up of study patients and adherence to study protocol and  
341 investigators brochure. Lead investigators will be quality control committee members.

342 The *lead investigators* check every 6 months, supervise the completion of the  
343 CRF form, and conduct a review and signature. All items should have a  
344 corresponding objective basis, be prepared for review and use, and should not be  
345 fabricated. The original data related to this experiment include: 1) Medical records:  
346 case registration form, case registration confirmation form, informed consent, patient  
347 background investigation, symptoms and signs, treatment and treatment content;2)  
348 Inspection report (pathological examination, imaging diagnosis result; 3) Laboratory  
349 test data (blood biochemical test, etc.). The investigator must save the relevant data of  
350 the clinical trial for five years after the end of the clinical trial.

351 **14.2 Data Manager**

352 Be responsible for data collection and verification. He or She will check the  
353 completeness and accuracy of the CRF and make necessary modifications or  
354 additions.



355 **14.3 Quality control committee (QCC)**

356 It consists of lead investigators and the data manager. They are responsible for  
357 agreement of final protocol; reviewing the progress of the study and if necessary  
358 agreeing to changes of the protocol and/or investigator brochure to facilitate the  
359 smooth running of the study; study planning; responsible for trial master file and  
360 randomization.

361 **15 Adverse Events**

362 ICPs were the adverse event reported by previous studies. In this study, the  
363 height of most anastomoses is expected to be less than 6cm. Theoretically, the  
364 possibility of perforation is small, but we still need to be alert. The investigator will  
365 be trained to voluntarily report from time to time when an adverse event occurs to the  
366 subject. In addition, the investigators should check the occurrence of the adverse  
367 events through consultation and interviews at regular visits during the study period.  
368 The situation of patients with adverse events should be discussed and reported to the  
369 *Quality Control Committee* to analyze the reasons. After discussion, if the actual  
370 existence is directly related to the research design, the plan should be modified.

371 **15.1 Classification of adverse events**

372 For the evaluation of adverse events in this research, please refer to the Chinese  
373 version of CTCAE v4.02 and [Accordion Severity Grading System]. Grade refers to  
374 the severity of the adverse event. CTCAE provides a specific clinical description of  
375 the severity of each adverse event (grades 1 to 5) according to the following general  
376 guidelines:

377 Grade 1: Mild; asymptomatic or mild; only clinically or diagnostically seen; no  
378 treatment is required.

379 Grade 2: Moderate; requires minor, topical, or non-invasive treatment;  
380 age-appropriate instrumental limitation of activities of daily living\*.

381           Grade 3: Severe or medically significant but not immediately life-threatening;  
382 leading to hospitalization or prolonging the hospital stay; disabled; personal activities  
383 of daily living are restricted\*\*.

384           Level 4: Life-threatening; urgent treatment is required.

385           Level 5: Death related to it.

386           Activities of Daily Living (ADL)

387           \*Instrumental activities of daily living refer to cooking, buying clothes, using the  
388 phone, managing finances, etc.

389           \*\*Personal activities of daily living refer to bathing, dressing, and undressing,  
390 eating, washing, taking medicine, etc., who are not bedridden.

## 391   **15.2   Records of Adverse Events**

392           All adverse events must be recorded on the adverse event report form, attached  
393 to the case report form. For each adverse event, the lead investigator must evaluate  
394 and record its severity, duration, relationship with surgery or TDTs, measures, and the  
395 outcome of the event.

## 396   **15.3   Report of Adverse Events**

397           If any "serious adverse event" or "unexpected adverse event" occurs, the  
398 researcher must report the adverse event to the *Quality Control Committee* within 24  
399 hours after learning of the adverse event, the *Quality Control Committee* responsible  
400 for handling serious adverse events, regardless of whether the event is related to  
401 treatment. The results of all reported serious adverse events (death, etc.) will be  
402 followed up and recorded. Reporting to relevant authorities by national regulations  
403 will be done by the responsible unit; in any case, all participants must comply with  
404 local legal regulations and requirements.

405

406 **Appendix 1**

407 **Current Definitions and ASA-Approved Examples**

| ASA Classification | PS | Definition                                                               | Adult Examples, Including, but not Limited to:                                                                                                                                                                                                                                                                                                           | Pediatric Examples, Including but not Limited to:                                                                                                                                                                                                                                                                                                                                                                                                                                                                                 | Obstetric Examples, Including but not Limited to:                                                                                                     |
|--------------------|----|--------------------------------------------------------------------------|----------------------------------------------------------------------------------------------------------------------------------------------------------------------------------------------------------------------------------------------------------------------------------------------------------------------------------------------------------|-----------------------------------------------------------------------------------------------------------------------------------------------------------------------------------------------------------------------------------------------------------------------------------------------------------------------------------------------------------------------------------------------------------------------------------------------------------------------------------------------------------------------------------|-------------------------------------------------------------------------------------------------------------------------------------------------------|
| ASA I              |    | A normal healthy patient                                                 | Healthy, non-smoking, no or minimal alcohol use                                                                                                                                                                                                                                                                                                          | Healthy (no acute or chronic disease), normal BMI percentile for age                                                                                                                                                                                                                                                                                                                                                                                                                                                              |                                                                                                                                                       |
| ASA II             |    | A patient with mild systemic disease                                     | Mild diseases only without substantive functional limitations. Current smoker, social alcohol drinker, pregnancy, obesity (30<BMI<40), well-controlled DM/HTN, mild lung disease                                                                                                                                                                         | Asymptomatic congenital cardiac disease, well controlled dysrhythmias, asthma without exacerbation, well controlled epilepsy, non-insulin dependent diabetes mellitus, abnormal BMI percentile for age, mild/moderate OSA, oncologic state in remission, autism with mild limitations                                                                                                                                                                                                                                             | Normal pregnancy*, well controlled gestational HTN, controlled preeclampsia without severe features, diet-controlled gestational DM.                  |
| ASA III            |    | A patient with severe systemic disease                                   | Substantive functional limitations; One or more moderate to severe diseases. Poorly controlled DM or HTN, COPD, morbid obesity (BMI ≥40), active hepatitis, alcohol dependence or abuse, implanted pacemaker, moderate reduction of ejection fraction, ESRD undergoing regularly scheduled dialysis, history (>3 months) of MI, CVA, TIA, or CAD/stents. | Uncorrected stable congenital cardiac abnormality, asthma with exacerbation, poorly controlled epilepsy, insulin dependent diabetes mellitus, morbid obesity, malnutrition, severe OSA, oncologic state, renal failure, muscular dystrophy, cystic fibrosis, history of organ transplantation, brain/spinal cord malformation, symptomatic hydrocephalus, premature infant PCA <60 weeks, autism with severe limitations, metabolic disease, difficult airway, long term parenteral nutrition. Full term infants <6 weeks of age. | Preeclampsia with severe features, gestational DM with complications or high insulin requirements, a thrombophilic disease requiring anticoagulation. |
| ASA IV             |    | A patient with severe systemic disease that is a constant threat to life | Recent (<3 months) MI, CVA, TIA or CAD/stents, ongoing cardiac ischemia or severe valve dysfunction, severe reduction of ejection fraction, shock, sepsis, DIC, ARD or ESRD not undergoing regularly scheduled dialysis                                                                                                                                  | Symptomatic congenital cardiac abnormality, congestive heart failure, active sequelae of prematurity, acute hypoxic-ischemic encephalopathy, shock, sepsis, disseminated intravascular coagulation, automatic implantable cardioverter-defibrillator, ventilator dependence, endocrinopathy, severe trauma, severe respiratory distress, advanced                                                                                                                                                                                 | Preeclampsia with severe features complicated by HELLP or other adverse event, peripartum cardiomyopathy with EF <40,                                 |

|        |                                                                                 |                                                                                                                                                                                             |                                                                                                                                                                                                                                                               |                                                                  |
|--------|---------------------------------------------------------------------------------|---------------------------------------------------------------------------------------------------------------------------------------------------------------------------------------------|---------------------------------------------------------------------------------------------------------------------------------------------------------------------------------------------------------------------------------------------------------------|------------------------------------------------------------------|
|        |                                                                                 |                                                                                                                                                                                             | oncologic state.                                                                                                                                                                                                                                              | uncorrected/decompensated heart disease, acquired or congenital. |
| ASA V  | A moribund patient who is not expected to survive without the operation         | Ruptured abdominal/thoracic aneurysm, massive trauma, intracranial bleed with mass effect, ischemic bowel in the face of significant cardiac pathology or multiple organ/system dysfunction | Massive trauma, intracranial hemorrhage with mass effect, patient requiring ECMO, respiratory failure or arrest, malignant hypertension, decompensated congestive heart failure, hepatic encephalopathy, ischemic bowel or multiple organ/system dysfunction. | Uterine rupture.                                                 |
| ASA VI | A declared brain-dead patient whose organs are being removed for donor purposes |                                                                                                                                                                                             |                                                                                                                                                                                                                                                               |                                                                  |

408

409 \* Although pregnancy is not a disease, the parturient's physiologic state is significantly altered from when the woman is not pregnant, hence the assignment of ASA 2 for a woman with uncomplicated pregnancy.

410 \*\*The addition of "E" denotes Emergency surgery: (An emergency is defined as existing when delay in treatment of the patient would lead to a significant increase in the threat to life or body part)

411 **Appendix 2**

412 **Pain Scales**

413 The (NPRS-11) is an 11-point scale for self-report of pain. It is the most commonly  
 414 used unidimensional pain scale. The respondent selects a whole number (integers  
 415 0–10) that best reflects the intensity (or other quality if requested of his/her pain. The  
 416 anchors are 0 = no pain and 10 = extreme pain/worst possible pain (there are various  
 417 wordings of the upper anchor). It is often categorized into: no pain = 0, mild pain =  
 418 1-3, moderate pain = 4-6, severe pain = 7-10, but these categories do not necessarily  
 419 reflect patient meanings, and are poor for any assessment of change. The categories  
 420 might be used to set targets for intervention outcomes. The NPRS can be administered  
 421 verbally (therefore also by telephone) or graphically for self-completion.

422

423

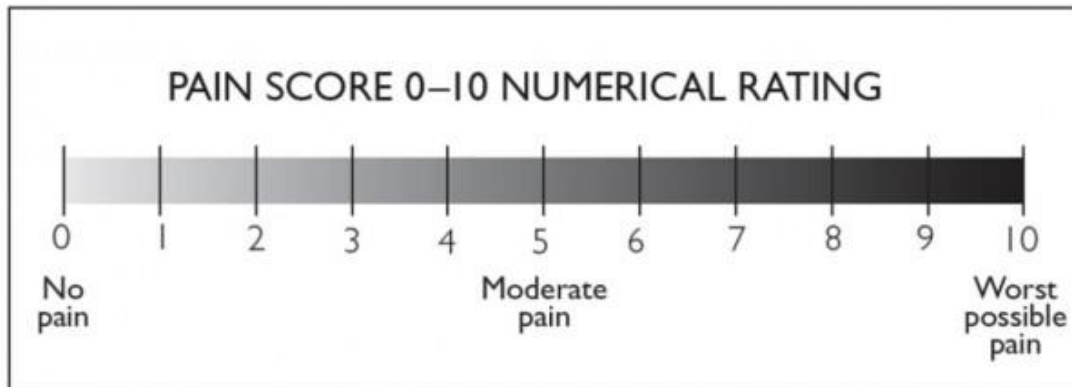

424

425 Pain scales (visual analog scale method):

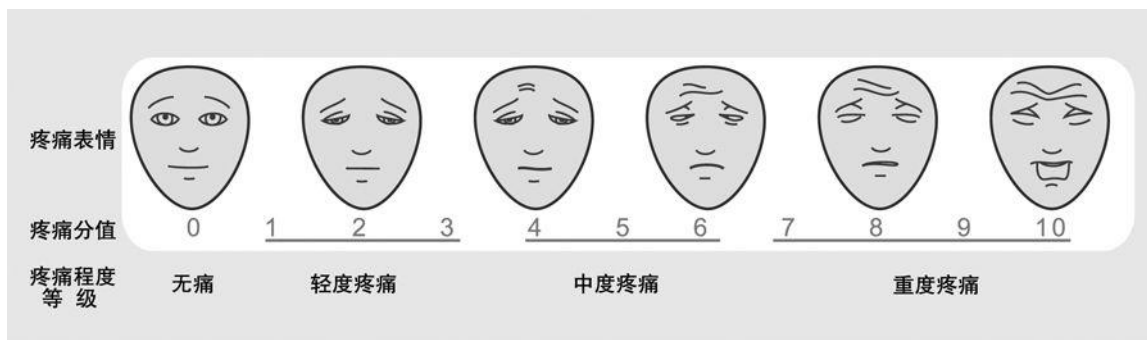

426

427

428 **Reference**

- 429 1. Salvans S, Mayol X, Alonso S, Messeguer R, Pascual M, Mojal S, et al.  
430 Postoperative peritoneal infection enhances migration and invasion capacities of  
431 tumor cells in vitro: an insight into the association between anastomotic leak and  
432 recurrence after surgery for colorectal cancer. *Ann Surg.* 2014;260(5):939-43;  
433 discussion 43-4.
- 434 2. Hanna MH, Vinci A, Pigazzi A. Diverting ileostomy in colorectal surgery: when  
435 is it necessary? *Langenbecks Arch Surg.* 2015;400(2):145-52.
- 436 3. Phatak UR, Kao LS, You YN, Rodriguez-Bigas MA, Skibber JM, Feig BW, et al.  
437 Impact of ileostomy-related complications on the multidisciplinary treatment of rectal  
438 cancer. *Ann Surg Oncol.* 2014;21(2):507-12.
- 439 4. Kye BH, Kim HJ, Kim JG, Cho HM. The nutritional impact of diverting  
440 stoma-related complications in elderly rectal cancer patients. *Int J Colorectal Dis.*  
441 2013;28(10):1393-400.
- 442 5. Xiao L, Zhang WB, Jiang PC, Bu XF, Yan Q, Li H, et al. Can transanal tube  
443 placement after anterior resection for rectal carcinoma reduce anastomotic leakage  
444 rate? A single-institution prospective randomized study. *World J Surg.*  
445 2011;35(6):1367-77.
- 446 6. Ha GW, Kim HJ, Lee MR. Transanal tube placement for prevention of  
447 anastomotic leakage following low anterior resection for rectal cancer: a systematic  
448 review and meta-analysis. *Ann Surg Treat Res.* 2015;89(6):313-8.
- 449 7. Lee SY, Kim CH, Kim YJ, Kim HR. Impact of anal decompression on  
450 anastomotic leakage after low anterior resection for rectal cancer: a propensity score  
451 matching analysis. *Langenbecks Arch Surg.* 2015;400(7):791-6.
- 452 8. Zhao WT, Hu FL, Li YY, Li HJ, Luo WM, Sun F. Use of a transanal drainage  
453 tube for prevention of anastomotic leakage and bleeding after anterior resection for  
454 rectal cancer. *World J Surg.* 2013;37(1):227-32.
- 455 9. Cong ZJ, Fu CG, Wang HT, Liu LJ, Zhang W, Wang H. Influencing factors of  
456 symptomatic anastomotic leakage after anterior resection of the rectum for cancer.  
457 *World J Surg.* 2009;33(6):1292-7.
- 458 10. Park JS, Choi GS, Kim SH, Kim HR, Kim NK, Lee KY, et al. Multicenter  
459 analysis of risk factors for anastomotic leakage after laparoscopic rectal cancer  
460 excision: the Korean laparoscopic colorectal surgery study group. *Ann Surg.*  
461 2013;257(4):665-71.
- 462 11. Kang CY, Halabi WJ, Chaudhry OO, Nguyen V, Pigazzi A, Carmichael JC, et al.  
463 Risk factors for anastomotic leakage after anterior resection for rectal cancer. *JAMA*  
464 *Surg.* 2013;148(1):65-71.
- 465 12. Snijders HS, Wouters MW, van Leersum NJ, Kolfshoten NE, Henneman D, de  
466 Vries AC, et al. Meta-analysis of the risk for anastomotic leakage, the postoperative  
467 mortality caused by leakage in relation to the overall postoperative mortality. *Eur J*  
468 *Surg Oncol.* 2012;38(11):1013-9.
- 469 13. Paun BC, Cassie S, MacLean AR, Dixon E, Buie WD. Postoperative

- 470 complications following surgery for rectal cancer. *Ann Surg.* 2010;251(5):807-18.
- 471 14. den Dulk M, Marijnen CA, Collette L, Putter H, Pahlman L, Folkesson J, et al.
- 472 Multicentre analysis of oncological and survival outcomes following anastomotic
- 473 leakage after rectal cancer surgery. *Br J Surg.* 2009;96(9):1066-75.
- 474 15. Kawada K, Hasegawa S, Hida K, Hirai K, Okoshi K, Nomura A, et al. Risk
- 475 factors for anastomotic leakage after laparoscopic low anterior resection with DST
- 476 anastomosis. *Surg Endosc.* 2014;28(10):2988-95.
- 477 16. Kim MK, Won DY, Lee JK, Kang WK, Kim JG, Oh ST. Comparative study
- 478 between transanal tube and loop ileostomy in low anterior resection for mid rectal
- 479 cancer: a retrospective single center trial. *Ann Surg Treat Res.* 2015;88(5):260-8.
- 480 17. Hidaka E, Ishida F, Mukai S, Nakahara K, Takayanagi D, Maeda C, et al.
- 481 Efficacy of transanal tube for prevention of anastomotic leakage following
- 482 laparoscopic low anterior resection for rectal cancers: a retrospective cohort study in a
- 483 single institution. *Surg Endosc.* 2015;29(4):863-7.
- 484 18. Nishigori H, Ito M, Nishizawa Y, Nishizawa Y, Kobayashi A, Sugito M, et al.
- 485 Effectiveness of a transanal tube for the prevention of anastomotic leakage after rectal
- 486 cancer surgery. *World J Surg.* 2014;38(7):1843-51.
- 487 19. Adamova Z. Transanal Tube as a Means of Prevention of Anastomotic Leakage
- 488 after Rectal Cancer Surgery. *Viszeralmedizin.* 2014;30(6):422-6.
- 489 20. Montemurro S, De Luca R, Caliandro C, Ruggieri E, Rucci A, Sciscio V, et al.
- 490 Transanal tube NO COIL(R) after rectal cancer proctectomy. The "G. Paolo II"
- 491 Cancer Centre experience. *Tumori.* 2012;98(5):607-14.
- 492 21. Rahbari NN, Weitz J, Hohenberger W, Heald RJ, Moran B, Ulrich A, et al.
- 493 Definition and grading of anastomotic leakage following anterior resection of the
- 494 rectum: a proposal by the International Study Group of Rectal Cancer. *Surgery.*
- 495 2010;147(3):339-51.
- 496
