# Supplementary material
Source: PubMed Central journal article supplement (PMC8495603)
Supplement: jamasurg-e214568-s005.pdf [file jamasurg-e214568-s005.pdf]

## Supplementary Online Content

Zhao S, Zhang L, Gao F, et al. Transanal drainage tube use for preventing anastomotic leakage prevention after laparoscopic low anterior resection in patients with rectal cancer: a randomized clinical trial. *JAMA Surg*. Published online October 6, 2021. doi:10.1001/jamasurg.2021.4568

**eTable 1.** Demographic and Surgical Characteristics of the Patients in Each Subgroup

**eTable 2.** Demographic and Surgical Characteristics of the Patients (Per-Protocol Analysis)

**eTable 3.** The Details of Anastomotic Leakage (Per-Protocol Analysis)

**eTable 4.** Anastomotic Leakage in Each Subgroup Based on the Presence or Absence of a Diverting Stoma (Per-Protocol Analysis)

**eTable 5.** Demographic and Surgical Characteristics of the Patients in Each Subgroup (Per-Protocol Analysis)

This supplementary material has been provided by the authors to give readers additional information about their work.

**eTable 1.** Demographic and Surgical Characteristics of the Patients in Each Subgroup

| Characteristics                          | Without DS        |                       | With DS              |                      |
|------------------------------------------|-------------------|-----------------------|----------------------|----------------------|
|                                          | TDT group (n=208) | Non-TDT group (n=191) | TDT group (n=72)     | Non-TDT group (n=89) |
| Age (years) (median, (IQR))              | 62 (54-68.75)     | 62 (52-67)            | 60 (52-68.75)        | 61 (51.5-72)         |
| Sex                                      |                   |                       |                      |                      |
| Male                                     | 128               | 109                   | 49                   | 60                   |
| Female                                   | 80                | 82                    | 23                   | 29                   |
| BMI (kg/m <sup>2</sup> ) (median, (IQR)) | 22.8 (20.8-24.62) | 22.8 (20.76-25.46)    | 23.44 (20.77-24.68 ) | 23.0 (20.45-24.81)   |
| ≥ 25                                     | 46                | 59                    | 15                   | 21                   |
| < 25                                     | 162               | 132                   | 57                   | 68                   |
| DM                                       | 21                | 17                    | 5                    | 12                   |
| Neoadjuvant chemotherapy                 | 8                 | 13                    | 4                    | 3                    |
| Tumor location from anal verge (cm)      |                   |                       |                      |                      |
| Median, (IQR)                            | 7 (6-9)           | 8 (6-9)               | 6 (5-7)              | 6 (5-8)              |
| Mean± SD                                 | 7.41± 1.78        | 7.63± 1.91            | 6.29± 1.91           | 6.16± 1.98           |
| Operation time (min) (median, (IQR))     | 170 (120-213.75)  | 165 (120-235)         | 184.5 (151.25-235)   | 190 (150-230)        |
| Blood loss                               |                   |                       |                      |                      |
| Median, (IQR) (ml)                       | 50 (30-80)        | 50 (20-80)            | 50 (50-100)          | 50 (50-100)          |
| Mean± SD (ml)                            | 62.96± 49.63      | 57.95± 45.49          | 79.72± 88.97         | 93.93± 180.56        |
| ≥ 50 ml                                  | 150               | 117                   | 58                   | 70                   |
| < 50 ml                                  | 58                | 74                    | 14                   | 19                   |
| Anastomotic level (cm) (median, (IQR))   | 4.5 (3.5-5)       | 5 (4-6)               | 4 (2.5-5)            | 3.5 (2.5-5)          |
| ≥ 5 cm                                   | 102               | 107                   | 19                   | 23                   |
| < 5 cm                                   | 106               | 84                    | 53                   | 66                   |
| Number of stapler firings                |                   |                       |                      |                      |
| = 1                                      | 53                | 39                    | 9                    | 8                    |
| > 1                                      | 155               | 152                   | 63                   | 81                   |

Abbreviations: DM: diabetes mellitus, BMI: body mass index, DS: diverting stoma, AL: anastomotic leakage, TDT: transanal drainage tube.

**eTable 2.** Demographic and Surgical Characteristics of the Patients (Per-Protocol Analysis)

| Characteristics                          | TDT group (n=279)   | Non-TDT group (n=279) |
|------------------------------------------|---------------------|-----------------------|
| Age (years) (median, (IQR))              | 61 (54-68)          | 62 (52-69)            |
| Sex                                      |                     |                       |
| Male (n, %)                              | 176 (63.1%)         | 169 (60.6%)           |
| Female (n, %)                            | 103 (36.9%)         | 110 (39.4%)           |
| BMI (kg/m <sup>2</sup> ) (median, (IQR)) | 23.10 (20.8 -24.63) | 22.84 (20.76-25.21)   |
| ≥ 25 (n)                                 | 61                  | 80                    |
| < 25 (n)                                 | 218                 | 199                   |
| DM (n, %)                                | 26 (9.3%)           | 29 (10.4%)            |
| Neoadjuvant chemotherapy (n, %)          | 12 (4.3%)           | 16 (5.7%)             |
| Tumor location from anal verge (cm)      |                     |                       |
| Median, (IQR)                            | 7 (6-8)             | 7 (5.5-9)             |
| Mean± SD                                 | 7.13± 1.87          | 7.16± 2.05            |
| Operation time (min) (median, (IQR))     | 180 (130-220)       | 175 (130-230)         |
| Blood loss                               |                     |                       |
| Median, (IQR) (ml)                       | 50 (40-100)         | 50 (25-100)           |
| Mean± SD (ml)                            | 67.40± 62.49        | 69.42± 109.62         |
| ≥ 50 ml (n)                              | 208                 | 186                   |
| < 50 ml (n)                              | 71                  | 93                    |
| Anastomotic level (cm) (median, (IQR))   | 4 (3-5)             | 4 (3-5.5)             |
| ≥ 5 cm (n)                               | 121                 | 130                   |
| < 5 cm (n)                               | 158                 | 149                   |
| Number of stapler firings                |                     |                       |
| = 1 (n)                                  | 62                  | 47                    |
| > 1 (n)                                  | 217                 | 232                   |
| DS                                       |                     |                       |
| Absent (n)                               | 207                 | 190                   |
| Present (n, %)                           | 72 (25.8%)          | 89 (31.9%)            |

Abbreviations: DM: diabetes mellitus, BMI: body mass index, DS: diverting stoma, AL: anastomotic leakage, TDT: transanal drainage tube.

| <b>eTable 3.</b> The Details of Anastomotic Leakage (Per-Protocol Analysis) |                              |                                  |                |           |               |
|-----------------------------------------------------------------------------|------------------------------|----------------------------------|----------------|-----------|---------------|
| <b>Endpoint</b>                                                             | <b>TDT group<br/>(n=279)</b> | <b>Non-TDT group<br/>(n=279)</b> | <b>P-value</b> | <b>RR</b> | <b>95% CI</b> |
| AL (n, %)                                                                   | 18 (6.5%)                    | 19 (6.8%)                        | 0.87           | 0.947     | 0.508-1.766   |
| Grade B<br>(n)                                                              | 14                           | 11                               | 0.43           |           |               |
| Grade C<br>(n)                                                              | 4                            | 8                                |                |           |               |
| Abbreviations: RR: relative risk, CI: confidence interval.                  |                              |                                  |                |           |               |

**eTable 4.** Anastomotic Leakage in Each Subgroup Based on the Presence or Absence of a Diverting Stoma (Per-Protocol Analysis)

| Leakage           | With a diverting stoma |                            |                 | Without a diverting stoma |                             |                 |
|-------------------|------------------------|----------------------------|-----------------|---------------------------|-----------------------------|-----------------|
|                   | TDT group<br>(n=72)    | Non-TDT<br>group<br>(n=89) | <i>P</i> -value | TDT<br>group<br>(n=207)   | Non-TDT<br>group<br>(n=190) | <i>P</i> -value |
| Present<br>(n, %) | 6 (8.3%)               | 4 (4.5%)                   | 0.50            | 12 (5.8%)                 | 15 (7.9%)                   | 0.41            |
| Grade B<br>(n, %) | 6 (8.3%)               | 4 (4.5%)                   |                 | 8 (3.9%)                  | 7 (3.7%)                    |                 |
| Grade C<br>(n, %) | 0                      | 0                          |                 | 4 (1.9%)                  | 8 (4.2%)                    |                 |

**eTable 5.** Demographic and Surgical Characteristics of the Patients in Each Subgroup (Per-Protocol Analysis)

| Characteristics                          | Without DS        |                       | With DS             |                      |
|------------------------------------------|-------------------|-----------------------|---------------------|----------------------|
|                                          | TDT group (n=207) | Non-TDT group (n=190) | TDT group (n=72)    | Non-TDT group (n=89) |
| Age (years) (median, (IQR))              | 62 (54-68)        | 62 (52-67.25)         | 60 (52-68.75)       | 61 (51.5-72)         |
| Sex                                      |                   |                       |                     |                      |
| Male                                     | 127               | 109                   | 49                  | 60                   |
| Female                                   | 80                | 81                    | 23                  | 29                   |
| BMI (kg/m <sup>2</sup> ) (median, (IQR)) | 22.8 (20.8-24.63) | 22.82 (20.77-25.52)   | 23.44 (20.77-24.68) | 23.0 (20.45-24.81)   |
| ≥ 25                                     | 46                | 59                    | 15                  | 21                   |
| < 25                                     | 161               | 131                   | 57                  | 68                   |
| DM                                       | 21                | 17                    | 5                   | 12                   |
| Neoadjuvant chemotherapy                 | 8                 | 13                    | 4                   | 3                    |
| Tumor location from anal verge (cm)      |                   |                       |                     |                      |
| Median, (IQR)                            | 7 (6-9)           | 8 (6-9)               | 6 (5-7)             | 6 (5-8)              |
| Mean± SD                                 | 7.42± 1.77        | 7.63± 1.91            | 6.29± 1.91          | 6.16± 1.98           |
| Operation time (min) (median, (IQR))     | 170 (120-215)     | 165 (120-235)         | 184.5 (151.25-235)  | 190 (150-230)        |
| Blood loss                               |                   |                       |                     |                      |
| Median, (IQR) (ml)                       | 50 (30-80)        | 50 (20-80)            | 50 (50-100)         | 50 (50-100)          |
| Mean± SD (ml)                            | 63.12± 49.7       | 57.94± 45.61          | 79.72± 88.97        | 93.93± 180.56        |
| ≥ 50 ml                                  | 150               | 116                   | 58                  | 70                   |
| < 50 ml                                  | 57                | 74                    | 14                  | 19                   |
| Anastomotic level (cm) (median, (IQR))   | 4.5 (3.5-5)       | 5 (4-6)               | 4 (2.5-5)           | 3.5 (2.5-5)          |
| ≥ 5 cm                                   | 102               | 107                   | 19                  | 23                   |
| < 5 cm                                   | 105               | 83                    | 53                  | 66                   |
| Number of stapler firings                |                   |                       |                     |                      |
| = 1                                      | 53                | 39                    | 9                   | 8                    |
| > 1                                      | 154               | 151                   | 63                  | 81                   |

Abbreviations: DM: diabetes mellitus, BMI: body mass index, DS: diverting stoma, AL: anastomotic leakage, TDT: transanal drainage tube.
