# Supplementary material
Source: PubMed Central journal article supplement (PMC8495603)
Supplement: jamasurg-e214568-s006.pdf [file jamasurg-e214568-s006.pdf]

## Data Sharing Statement

Zhao. Transanal Drainage Tube Use for Preventing Anastomotic Leakage After Laparoscopic Low Anterior Resection in Patients With Rectal Cancer. *JAMA Surg*. Published October 06, 2021. doi:10.1001/jamasurg.2021.4568

### Data

**Data available:** No
